# Supplementary material for: A Repurposing Approach for Uncovering the Anti-Tubercular Activity of FDA-Approved Drugs with Potential Multi-Targeting Profiles
Source: MDPI journal article supplement (doi:10.3390/molecules24234373), 2019-11-29
Supplement: s1 [file s1]

# A Repurposing Approach for Uncovering the Anti-Tubercular Activity of FDA-Approved Drugs with Potential Multi-Targeting Profiles

Basem Battah <sup>1</sup>, Giulia Chemi <sup>2</sup>, Stefania Butini <sup>2</sup>, Giuseppe Campiani <sup>2</sup>, Simone Brogi <sup>3,\*</sup>, Giovanni Delogu <sup>4,5</sup> and Sandra Gemma <sup>2,\*</sup>

<sup>1</sup> Fondazione Policlinico Universitario A. Gemelli, IRCCS Rome. Largo A. Gemelli, 0 00168 Rome, Italy; basem.battah.sc@hotmail.com

<sup>2</sup> Department of Biotechnology (DoE 2018-2022), Chemistry and Pharmacy (DoE 2018-2022), University of Siena, via Aldo Moro 2, 53100 Siena, Italy; giu.chemi@gmail.com (G.C.); stefania.butini@unisi.it (S.B.); campiani@unisi.it (G.C.)

<sup>3</sup> Department of Pharmacy, University of Pisa, via Bonanno 6, 56126 Pisa, Italy

<sup>4</sup> Institute of Microbiology, Università Cattolica del Sacro Cuore, Roma–Largo F. Vito, 1, 00168 Rome, Italy; giovanni.delogu@unicatt.it

<sup>5</sup> Mater Olbia Hospital, SS 125 Orientale Sarda, 07026 Olbia, Italy

\* Correspondence: simone.brogi@unipi.it (S.B.); GEMMA@UNISI.IT (S.G.); Tel.: +39-050-2219613 (S.B.); +39-0577-234326 (S.G.)

## Supplementary Materials

### Table of contents

Table S1

page S2

**Table S1.** Full list of FDA-compounds selected from virtual screening. The 29 compounds selected for the biological evaluation are underlined.

| Compound          | Structure                                                                           | Test Performed Against <i>M. Tuberculosis</i>                               | Activity                  |
|-------------------|-------------------------------------------------------------------------------------|-----------------------------------------------------------------------------|---------------------------|
| Acemetacin        | 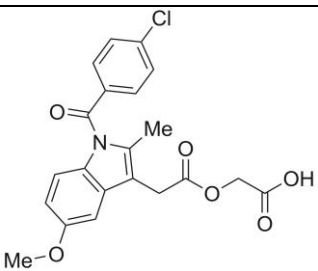   | HTS against <i>M. tuberculosis</i> in 7H9 media<br>HTS against H37Rv strain | inactive                  |
| Acenocoumarol     |    | HTS against H37Rv strain                                                    | active                    |
| <u>Amifostine</u> |   | no                                                                          | not previously determined |
| <u>Arotinolol</u> |  | no                                                                          | not previously determined |
| Asacol            |  | HTS against H37Rv strain                                                    | inactive                  |
| Atovaquone        |  | HTS against H37Rv strain                                                    | active                    |
| Baclofen          |  | HTS against H37Rv strain                                                    | inactive                  |
| Bezafibrat        |  | HTS against <i>M. tuberculosis</i> in 7H9 media<br>HTS against H37Rv strain | inactive                  |

|                     |                                                                                     |                                                                             |                           |
|---------------------|-------------------------------------------------------------------------------------|-----------------------------------------------------------------------------|---------------------------|
| <u>Bicalutamide</u> | 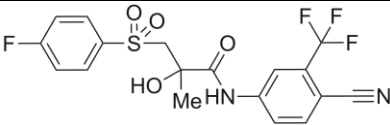   | no                                                                          | not previously determined |
| <u>Biotin</u>       |    | no                                                                          | not previously determined |
| <u>Bromfenac*</u>   |    | no                                                                          | not previously determined |
| <u>Carfilzomib</u>  |    | no                                                                          | not previously determined |
| Carzenide           |   | HTS against <i>M. tuberculosis</i> in 7H9 media<br>HTS against H37Rv strain | inactive                  |
| <u>Cellcept</u>     |  | no                                                                          | not previously determined |
| Celecoxib           |  | HTS against <i>M. tuberculosis</i> in 7H9 media                             | inactive                  |
| Chloramphenicol     |  | HTS against H37Rv strain                                                    | active                    |
| <u>Cidofovir</u>    |  | no                                                                          | not previously determined |
| Clonixin            |  | HTS against <i>M. tuberculosis</i> in 7H9 media                             | inactive                  |

|              |                                                                                     |                                                                             |                                            |
|--------------|-------------------------------------------------------------------------------------|-----------------------------------------------------------------------------|--------------------------------------------|
| Clorazepate  | 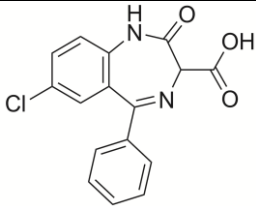   | no                                                                          | not previously determined<br>not purchased |
| Diflunisal   |    | no                                                                          | not previously determined                  |
| Eltrombopag  |    | no                                                                          | not previously determined                  |
| Fenoldopam   |    | HTS against H37Rv strain                                                    | inactive                                   |
| Fenoterol    |   | HTS against <i>M. tuberculosis</i> in 7H9 media                             | inactive                                   |
| Fentanyl     |  | no                                                                          | not previously determined<br>not purchased |
| Florantyrone |  | no                                                                          | not previously determined<br>not purchased |
| Flunarizine  |  | HTS against H37Rv strain                                                    | active                                     |
| Flurbiprofen |  | HTS against <i>M. tuberculosis</i> in 7H9 media<br>HTS against H37Rv strain | inactive                                   |

|                    |                                                                                     |                          |                                            |
|--------------------|-------------------------------------------------------------------------------------|--------------------------|--------------------------------------------|
| <u>Fluvastatin</u> | 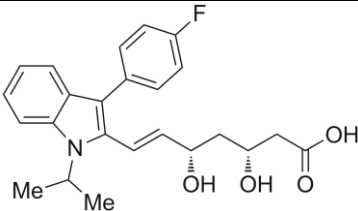   | no                       | not previously determined                  |
| <u>Fosamax</u>     |    | no                       | not previously determined                  |
| <u>Fosinopril</u>  |    | no                       | not previously determined                  |
| Fosphenytoin       |   | no                       | not previously determined<br>not purchased |
| Furosemide         |  | HTS against H37Rv strain | active                                     |
| Ibuprofen          |  | HTS against H37Rv strain | inactive                                   |
| Labetalol          |  | HTS against H37Rv strain | inactive                                   |
| Ketoprofen         |  | HTS against H37Rv strain | inactive                                   |
| Ketorolac          |  | HTS against H37Rv strain | inactive                                   |

|                    |                                                                                     |                                                 |                                            |
|--------------------|-------------------------------------------------------------------------------------|-------------------------------------------------|--------------------------------------------|
| <u>Ledipasvir</u>  | 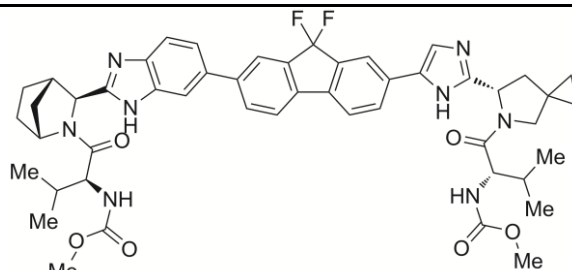   | no                                              | not previously determined                  |
| Loperamide         |    | HTS against H37Rv strain                        | active                                     |
| Lopinavir          |    | no                                              | not previously determined<br>not purchased |
| <u>Mitiglinide</u> |   | no                                              | not previously determined                  |
| Nadifloxacin       |  | HTS against <i>M. tuberculosis</i> in 7H9 media | inconclusive                               |
| Naproxen           |  | HTS against H37Rv strain                        | inactive                                   |
| <u>Naratriptan</u> |  | no                                              | not previously determined                  |
| <u>Nelarabine</u>  |  | no                                              | not previously determined                  |

|                   |                                                                                     |                          |                           |
|-------------------|-------------------------------------------------------------------------------------|--------------------------|---------------------------|
| Niclosamide       | 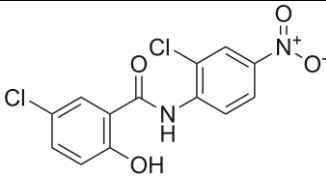   | HTS against H37Rv strain | active                    |
| <u>Nintedanib</u> |    | no                       | not previously determined |
| Nizoral           |    | HTS against H37Rv strain | active                    |
| Ofloxacin         |   | HTS against H37Rv strain | active                    |
| Olopatadine       |  | HTS against H37Rv strain | inactive                  |
| <u>Pazopanib</u>  |  | no                       | not previously determined |
| <u>Pemetrexed</u> |  | no                       | not previously determined |
| <u>Peramivir</u>  |  | no                       | not previously determined |

|                          |                                                                                     |                                                 |                           |
|--------------------------|-------------------------------------------------------------------------------------|-------------------------------------------------|---------------------------|
| <u>Picosulfuric acid</u> | 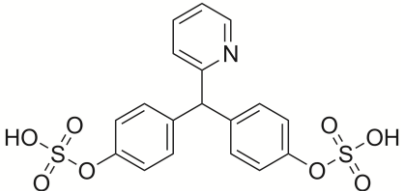   | no                                              | not previously determined |
| Pidolate                 |    | HTS against <i>M. tuberculosis</i> in 7H9 media | inactive                  |
| Pidotimod                |    | HTS against H37Rv strain                        | inactive                  |
| <u>Pitavastatin</u>      |    | no                                              | not previously determined |
| Prochlorperazine         |   | HTS against H37Rv strain                        | active                    |
| <u>Pyritinol</u>         |  | no                                              | not previously determined |
| <u>Ranelic acid</u>      |  | no                                              | not previously determined |
| <u>Rebamipide*</u>       |  | no                                              | not previously determined |
| Rivabirin                |  | HTS against H37Rv strain                        | inactive                  |



|                    |                                                                                     |                                                                             |                           |
|--------------------|-------------------------------------------------------------------------------------|-----------------------------------------------------------------------------|---------------------------|
| Sertraline         | 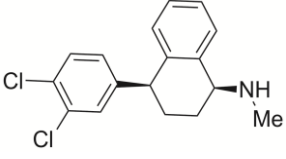   | HTS against H37Rv strain                                                    | active                    |
| <u>Sitagliptin</u> |    | no                                                                          | not previously determined |
| <u>Sofalcone</u>   |    | no                                                                          | not previously determined |
| Sulfasalazine      |   | HTS against H37Rv strain                                                    | inactive                  |
| Sulindac           |  | HTS against H37Rv strain                                                    | inactive                  |
| <u>Tamsulosin</u>  |  | no                                                                          | not previously determined |
| Telmisartan        |  | HTS against <i>M. tuberculosis</i> in 7H9 media<br>HTS against H37Rv strain | inactive                  |
| Terfenadine        |  | HTS against H37Rv strain                                                    | active                    |

|                      |                                                                                    |                                                 |          |
|----------------------|------------------------------------------------------------------------------------|-------------------------------------------------|----------|
| Terazosin            | 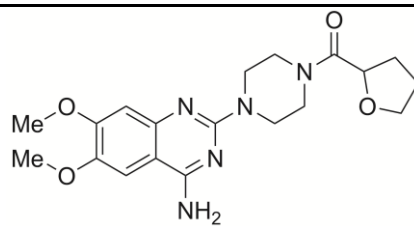  | HTS against H37Rv strain                        | inactive |
| <u>Thiamphenicol</u> |   | HTS against H37Rv strain                        | active   |
| Thymopentin          |  | HTS against <i>M. tuberculosis</i> in 7H9 media | inactive |

\* These compounds showed high scores against Zmp1 only. Not purchased: compounds that were not available during the work or were available in a small amount for the tests. The data about the *in vitro* tests against *Mycobacterium* were found in PubChem (<https://pubchem.ncbi.nlm.nih.gov/>). The tests considered were against *M. tuberculosis* H37Rv strain (High Throughput Screen to Identify Inhibitors of *Mycobacterium tuberculosis* H37Rv AID: 1332 <https://pubchem.ncbi.nlm.nih.gov/bioassay/1332>; AID: 1626 <https://pubchem.ncbi.nlm.nih.gov/bioassay/1626>) and against *M. tuberculosis* in 7H9 media (High Throughput Screening Assay used to Identify Novel Compounds that Inhibit *Mycobacterium tuberculosis* in 7H9 Media AID: 449762 <https://pubchem.ncbi.nlm.nih.gov/bioassay/449762>).
